# Supplementary material for: Self-healing polymer–clay hybrids by facile complexation of a waterborne polymer with a clay
Source: Royal Society of Chemistry journal article supplement (doi:10.1039/d1ma00099c), 2021-01-01
Supplement: d1ma00099c1.pdf [file d1ma00099c1.pdf]

## Electronic Supplementary Information for

### Self-Healing Polymer-Clay Hybrids by Facile Complexation of a Waterborne Polymer with a Clay

*Aranee (Pleng) Teepakakorn<sup>1</sup>, Makoto Ogawa<sup>2\*</sup>*

1. School of Molecular Science and Engineering, 2. School of Energy Science and Engineering,  
Vidyasirimedhi Institute of Science and Technology (VISTEC), 555 Moo 1 Payupnai, Wangchan,  
Rayong 21210, Thailand

\*E-mail: makoto.ogawa@vistec.ac.th.

#### **List of content**

**Figure S1.** XRD patterns of 4 PVA-SWF (a,b) and 5 PVA-SWF (c,d) films before (black) and after (red) the soaking in water for 24 h.

**Figure S2.** Microscopy images of re-healing 1.80 PVA-SWF film for 10 times by immersion in water for 1 min.

**Figure S3.** Microscopy images of the engraved 1.80 PVA-SWF films with the thickness of 2  $\mu\text{m}$  (top) and 1  $\mu\text{m}$  (bottom) before and after immersion in water for 30 min and 24h, respectively.

**Figure S4.** Photographs of 1.80 PVA-SWF coated on hook; as prepared (A,D), attachment on the glass (B) and frosted glass (E) with hanging 500 g of iron balls, pull out the hook from the glass (C) and frosted glass (F)

**Figure S5.** Temporal evolution of the depth along the length of the defect in the 1.80 PVA-SWF films before (black) and after (red) attachment on the frosted glass

**Figure S6.** Temporal evolution of the depth along the length of the engraved 0.36 (A), 1.08 (B), 1.80 (C), 4 (D) and 5 (E) PVA-SWF films

**Figure S7.** SEM image of a synthetic hectorite (Sumecton SWF) with the magnification of 50k.

**Figure S8.** Schematic illustration and photographs showing the dimension of specimen for the “shear lap test”.

**Figure S9.** Relationship between the shear load and the displacement of 0.36 (red) and 1.80 (black) PVA-SWF films.

**Table S1.** Weights of the films before and after the soaking in water for 24 h

**Video S1.** Attachment the hook on the glass window

**Video S2.** Attachment the hook on the frosted glass window

**Video S3.** Pull out the hook from the glass window

**Video S4.** Pull out the hook from the frosted glass window

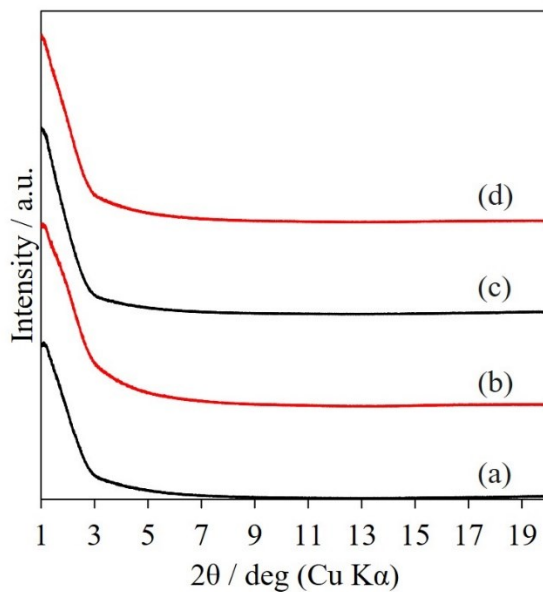

**Figure S1.** XRD patterns of 4 PVA-SWF (a,b) and 5 PVA-SWF (c,d) films before (black) and after (red) the soaking in water for 24 h.

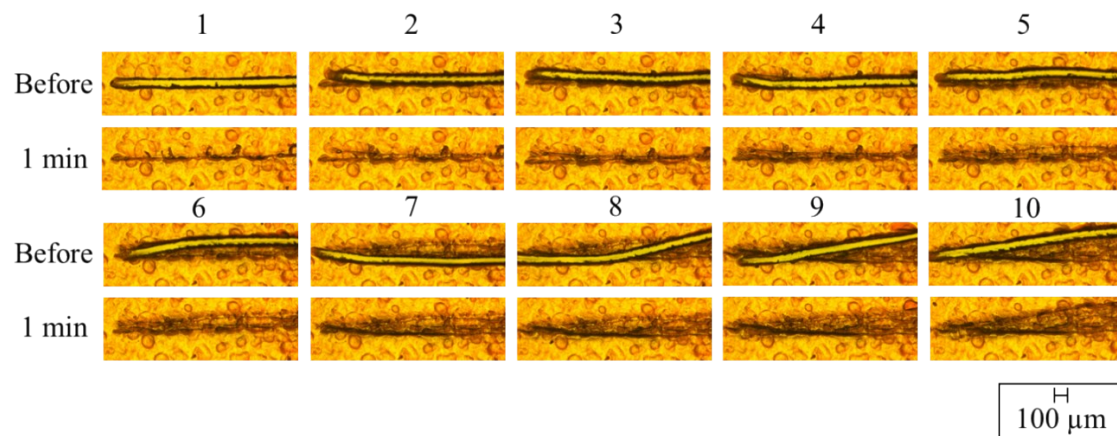

**Figure S2.** Microscopy images of re-healing 1.80 PVA-SWF film for 10 times by immersion in water for 1 min.

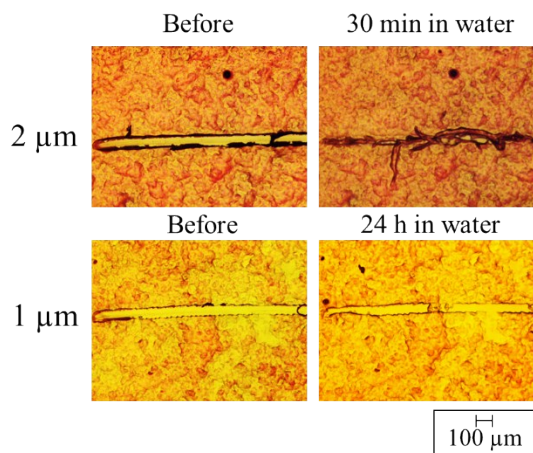

**Figure S3.** Microscopy images of the engraved 1.80 PVA-SWF films with the thickness of 2 μm (top) and 1 μm (bottom) before and after immersion in water for 30 min and 24h, respectively.

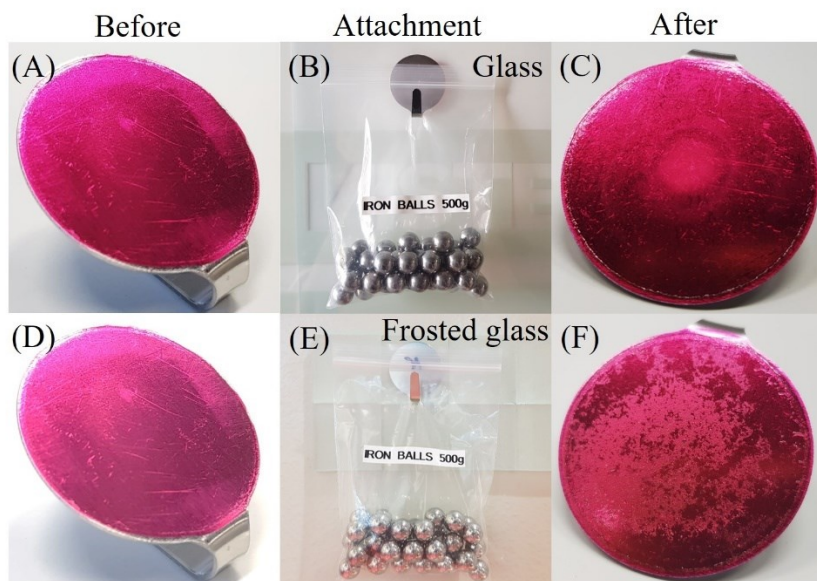

**Figure S4.** Photographs of 1.80 PVA-SWF coated on hook; as prepared (A,D), attachment on the glass (B) and frosted glass (E) with hanging 500 g of iron balls, pull out the hook from the glass (C) and frosted glass (F)

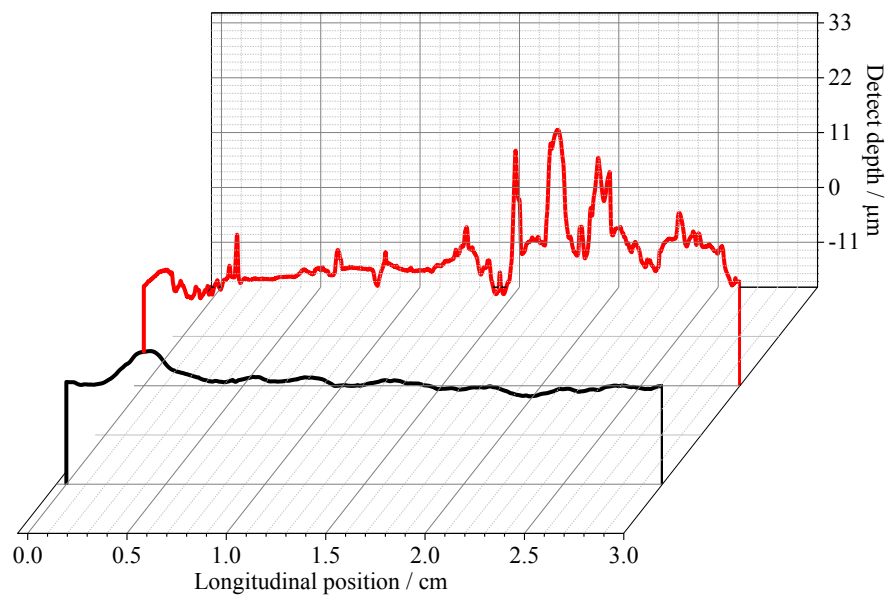

**Figure S5.** Temporal evolution of the depth along the length of the defect in the 1.80 PVA-SWF films before (black) and after (red) attachment on the frosted glass

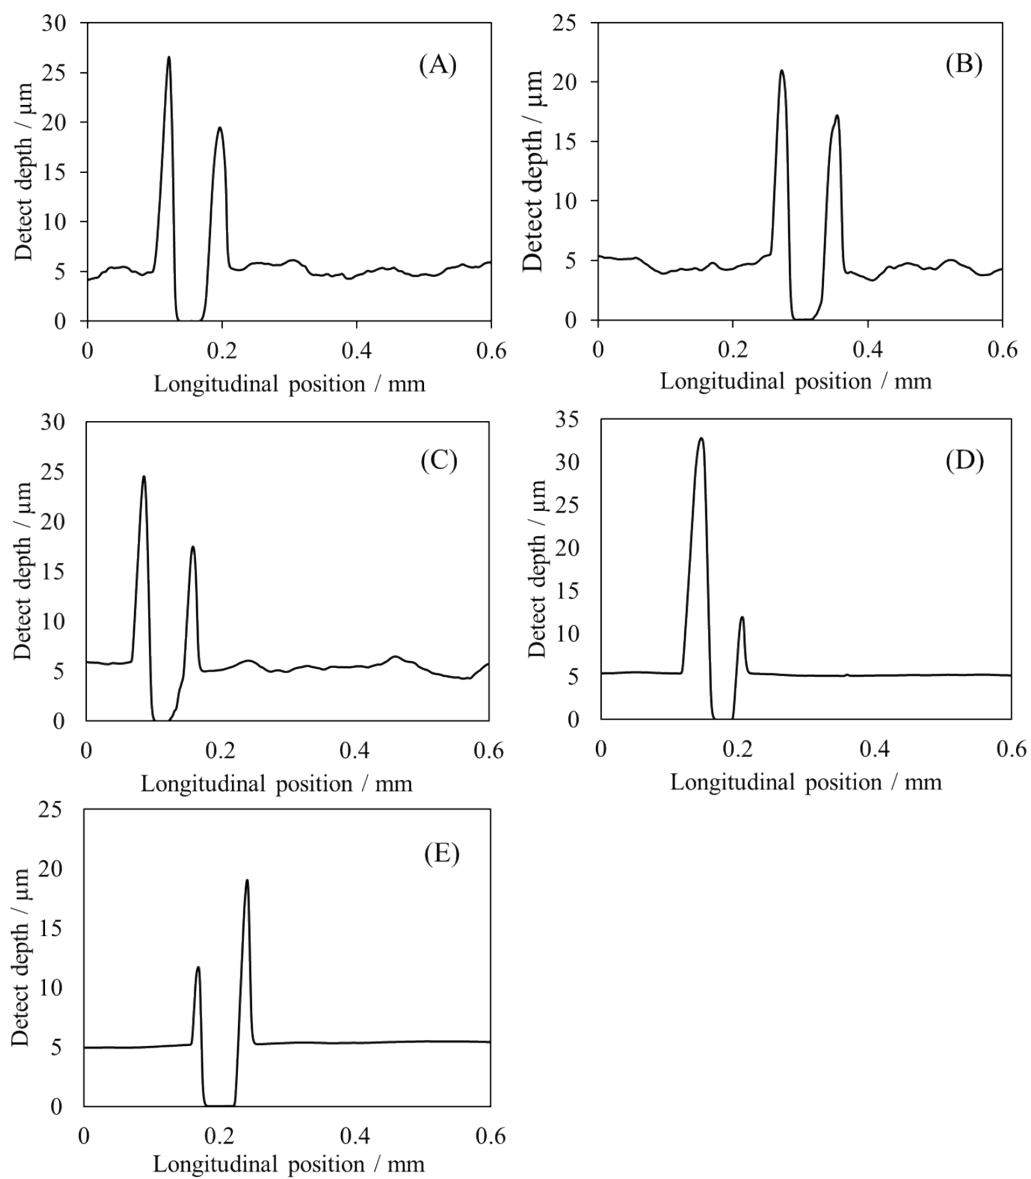

**Figure S6.** Temporal evolution of the depth along the length of the engraved 0.36 (A), 1.08 (B), 1.80 (C), 4 (D) and 5 (E) PVA-SWF films

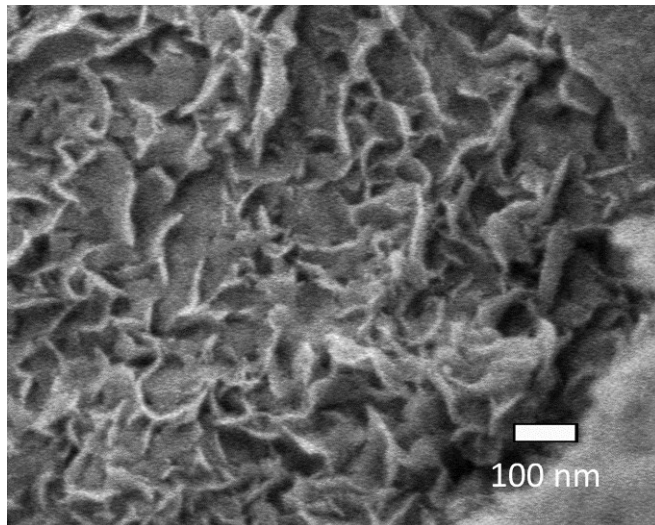

**Figure S7.** SEM image of a synthetic hectorite (Sumecton SWF) with the magnification of 50k.

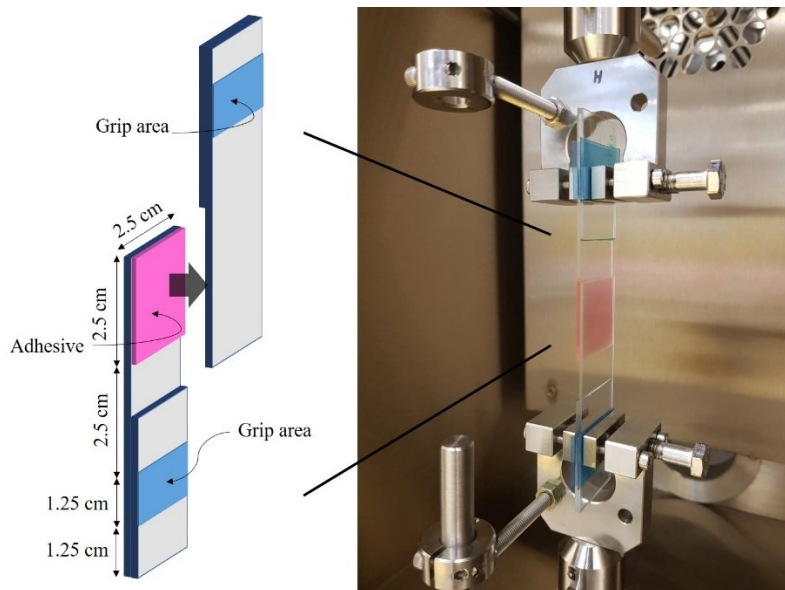

**Figure S8.** Schematic illustration and photographs showing the dimension of specimen for the “shear lap test”.

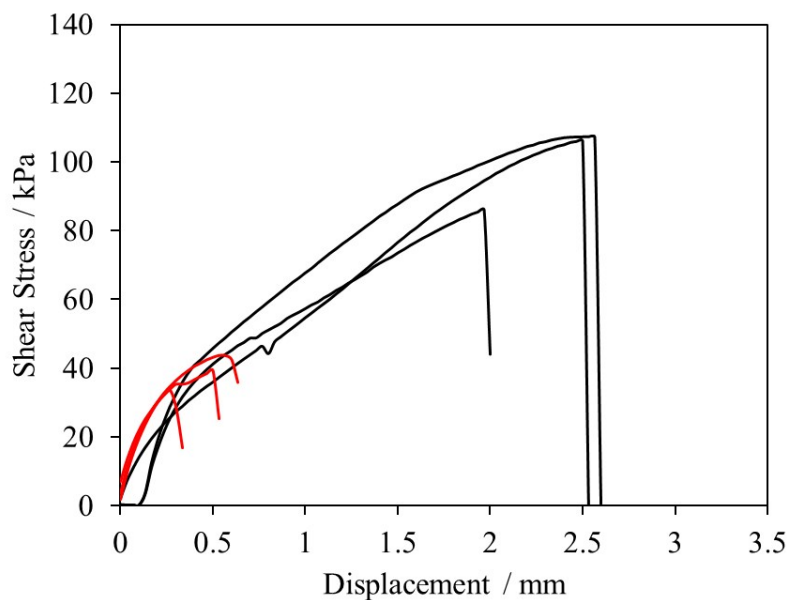

**Figure S9.** Relationship between the shear load and the displacement of 0.36 (black) and 1.80 (red) PVA-SWF films.

**Table S1** Weights of the films before and after the soaking in water for 24 h

| Weight of film<br>(mg) | SWF   | PVA-SWF weight ratio |       |       |       |       | PVA   |
|------------------------|-------|----------------------|-------|-------|-------|-------|-------|
|                        |       | 0.36                 | 1.08  | 1.80  | 4     | 5     |       |
| Before                 | 777.8 | 759.7                | 782.9 | 767.8 | 735.8 | 731.6 | 770.9 |
| After                  | 773.6 | 759.7                | 782.8 | 767.8 | 735.2 | 730.8 | 768.4 |
